# Supplementary material for: Inferring causal pathways between metabolic processes and liver fat accumulation: an IMI DIRECT study
Source: bioRxiv or medRxiv preprint supplement (doi:10.1101/2021.08.31.21262709), 2021-09-01

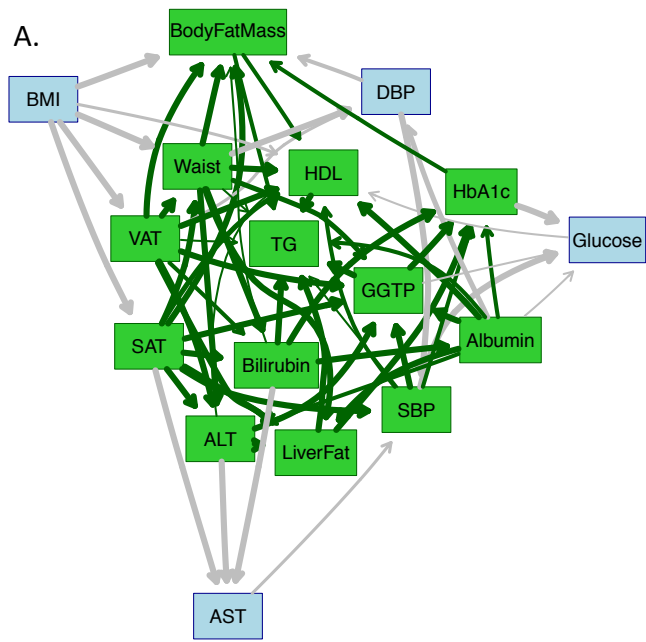

strength and directional probabilities  $\geq 0.8$

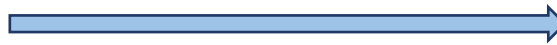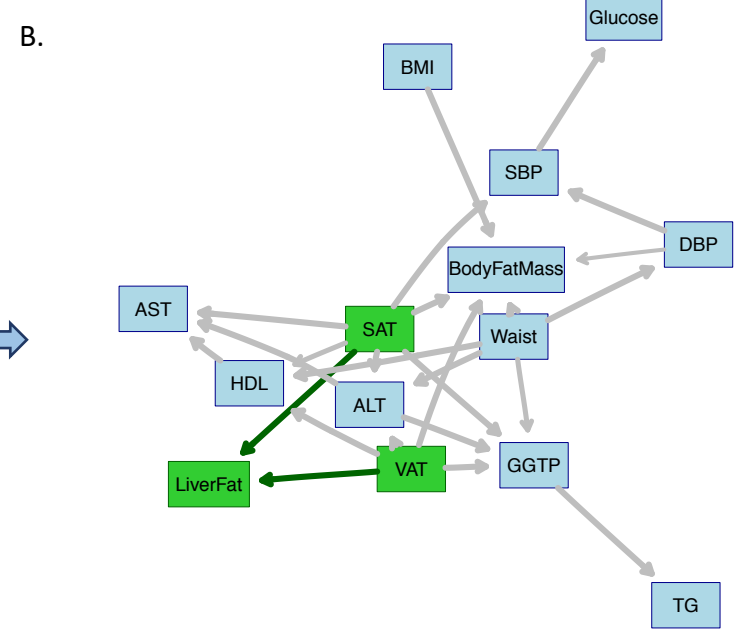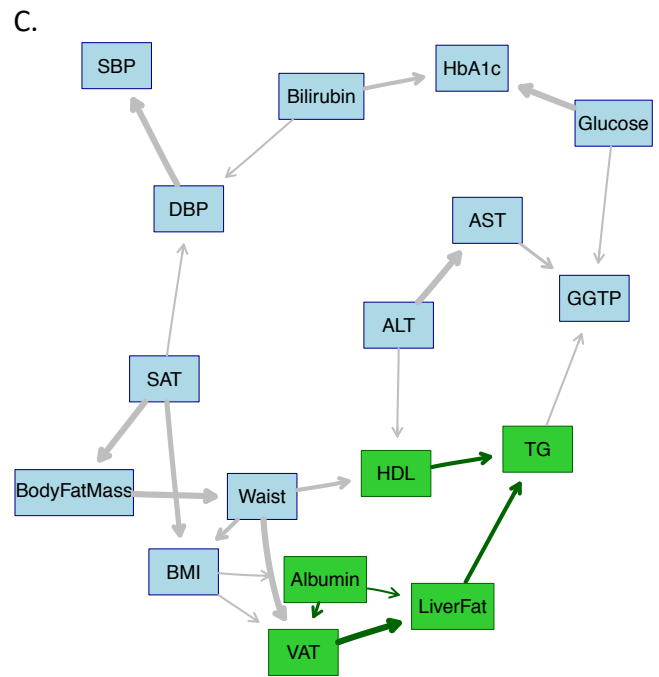

Strength  $\geq 0.8$  and directional probabilities  $\geq 0.7$

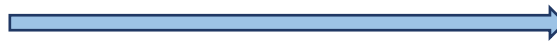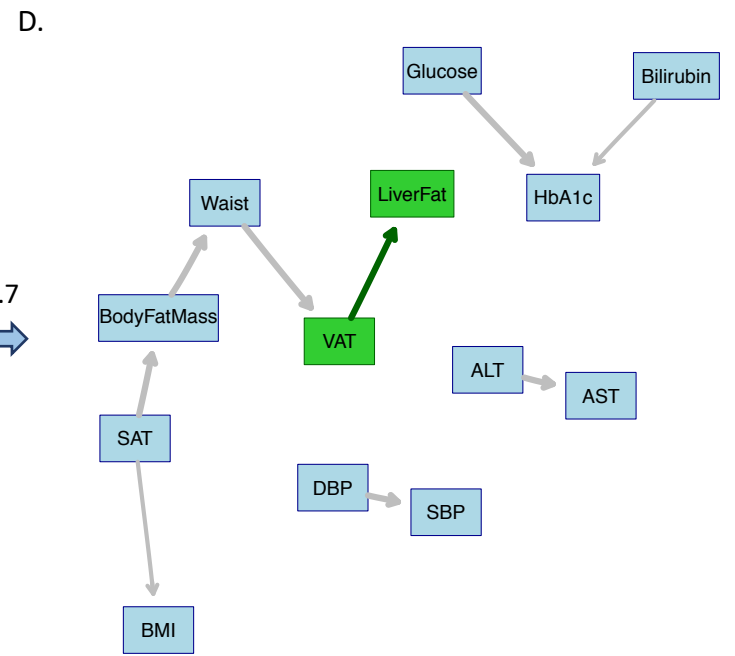

Supplement: Supplementary file [file media-5.pdf]
