# Supplementary material for: Inferring causal pathways between metabolic processes and liver fat accumulation: an IMI DIRECT study
Source: bioRxiv or medRxiv preprint supplement (doi:10.1101/2021.08.31.21262709), 2021-09-01

A.

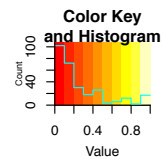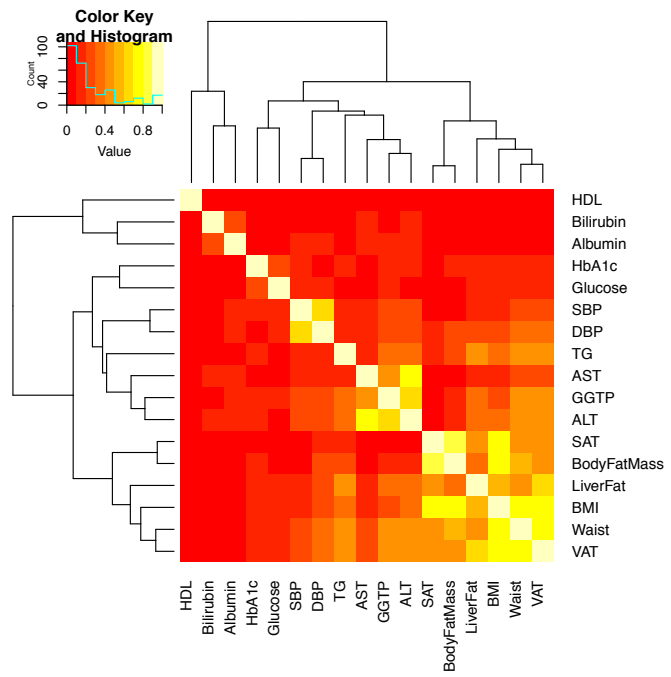

B.

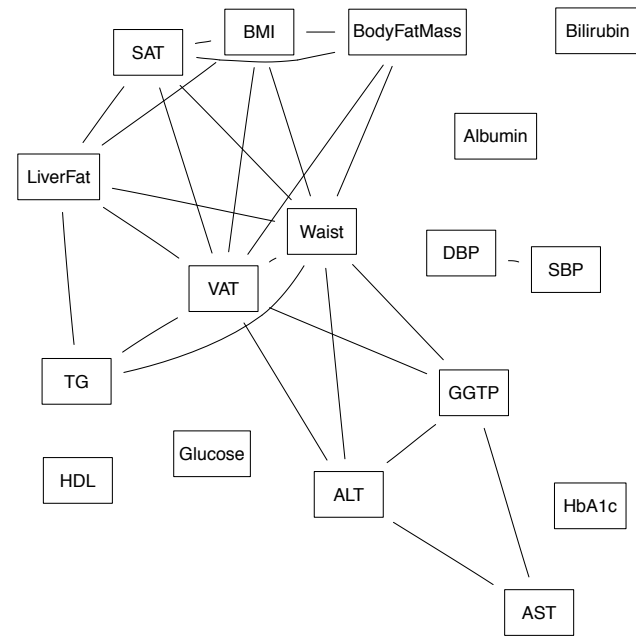

C.

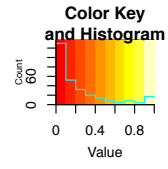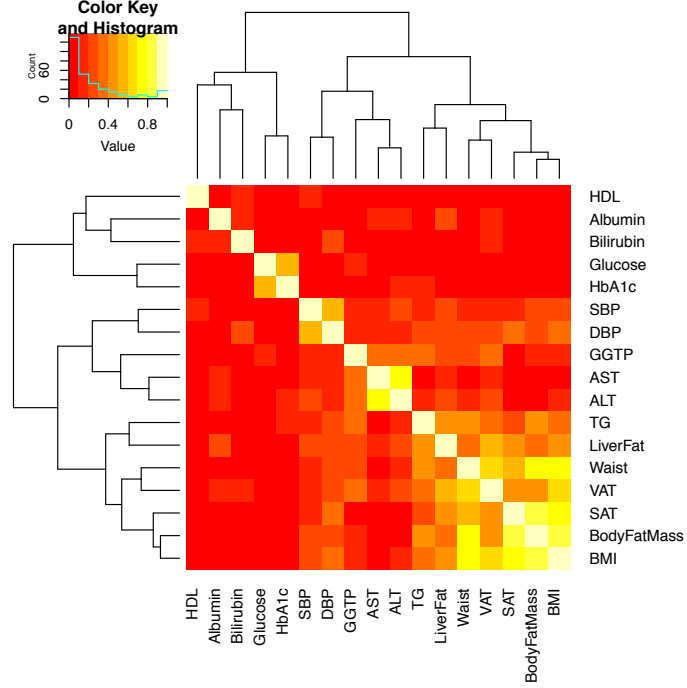

D.

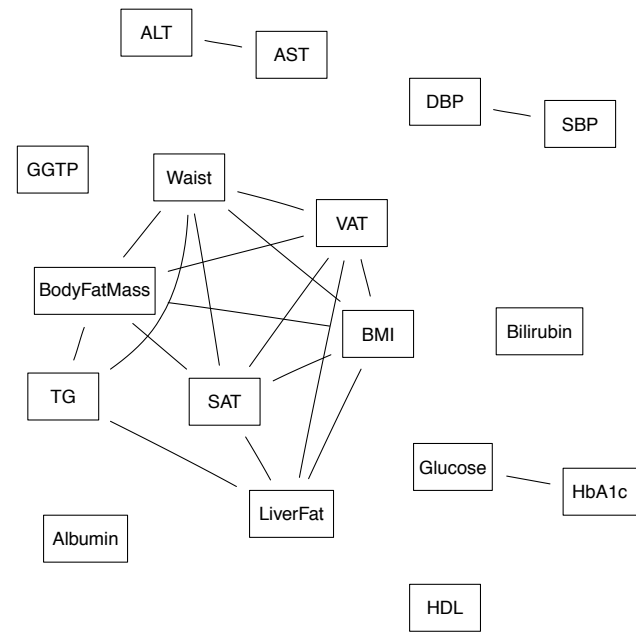

Supplement: Supplementary file [file media-12.pdf]
